# Supplementary material for: Modular design of SPIRO-OMeTAD analogues as hole transport materials in solar cells
Source: Royal Society of Chemistry journal article supplement (doi:10.1039/c5cc02129d), 2015-01-01
Supplement: c5cc02129d1.pdf [file c5cc02129d1.pdf]

# Supplementary Information: Modular design of SPIRO-OMeTAD analogues as hole transport materials in solar cells

*Alexander T. Murray, Jarvist M. Frost, Christopher H. Hendon,  
Christopher D. Molloy, David R. Carbery and Aron Walsh\**

Department of Chemistry, University of Bath, Bath, BA2 7AY, UK

## Cost Analysis

At present, the cost of *p,p*-SPIRO-OMeTAD is approximately £227 (\$344 USD)/g (Sigma-Aldrich UK). Given the per gram cost of both *p*-methoxyaniline and *p*-methoxybromobenzene are inexpensive (<£0.10/g, Sigma-Aldrich UK) the bulk synthetic cost is attributed to the spiro-fluorene precursor 2,2',7,7'-Tetrabromo-9,9'-spirobi[9H-fluorene], £77 (\$116 USD)/g (Sigma Aldrich UK), and the Pd catalysts, both of which are constant. It is unsurprising that the crowded all-carbon quaternary spiro-centre is expensive to produce. However, the peripheral aryl fragments used to form the secondary aniline may also become costly with increased substitution complexity, and this could negatively impact the balance of systems cost of a module, despite an increase in device efficiency.

The costs of primary anilines and bromides (Tables S1 and S2, respectively) used in the typical synthetic pathway are presented in Table S3. There are only three derivatives that have notably high associated costs: the  $r_1 = p, r_2 = o, o$ , the  $r_1 = p, r_2 = o, p, o$  and the desirable  $r_1 = o, o, r_2 = o, o$ . The  $r_1 = p, r_2 = o$  derivative, as synthesised by Il Seok and co-workers, should be no more costly than the  $r_1 = p, r_w = p$ -derivative (typical SPIRO-OMeTAD). In particular, the marginal cost of the di-substituted aniline that would be used for the  $r_1 = o, o, r_2 = o, o$  compound is £63 (\$93 USD)/g as opposed to the *p,p*-aniline at £0.19/g.<sup>32,33</sup> Four equivalents of this secondary aniline impacts the overall cost significantly. Nevertheless, for fundamental research *o,o*-*o,o*-SPIRO-OMeTAD should be an interesting and promising molecule, particularly with the potential economies of scale for the anilines.

## Computational Details

The SPIRO-OMeTAD analogues were constructed by hand, starting with the SPIRO-OMeTAD archetype. Geometries were then relaxed to their potential energy minimum at the B3LYP/6-31g\* hybrid-DFT level of theory in vacuum, as a closed-shell neutral configuration. The Kohn-Sham eigenvalues (HOMO and LUMO frontier orbital energies) were extracted from these calculations.

The delta-SCF method was used to more accurately estimate the ionization potential of each system. Here, the ionization potential was evaluated as being the difference in total DFT energy between the neutral configuration, and a resolved electronic structure configuration (at the neutral geometry) as the 1+ cation in a doublet spin configuration.

All calculations were with performed with Gaussian09.

**Table S1. Costing of methoxyanilines from commercial suppliers**

| <b>ANILINES</b>                                                                     | <b>£/g</b> | <b>SUPPLIER</b> |
|-------------------------------------------------------------------------------------|------------|-----------------|
| 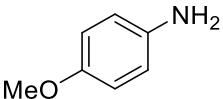   | 0.08       | Sigma-Aldrich   |
|    | 0.28       | Sigma-Aldrich   |
|    | 0.08       | Sigma-Aldrich   |
|    | 27.8       | Alfa-Aesar      |
|    | 2.16       | Alfa-Aesar      |
|   | 0.43       | Sigma-Aldrich   |
|  | 2.48       | Sigma-Aldrich   |
|  | 2.69       | Alfa-Aesar      |

**Table S2. Costing of methoxyaryl bromides from commercial suppliers**

| <b>BROMIDES</b>                                                                     | <b>£/g</b> | <b>SUPPLIER</b> |
|-------------------------------------------------------------------------------------|------------|-----------------|
| 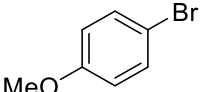   | 0.11       | Sigma-Aldrich   |
|    | 0.62       | Sigma-Aldrich   |
|    | 0.61       | Sigma-Aldrich   |
|    | 35.5       | Sigma-Aldrich   |
|    | 2.17       | Alfa-Aesar      |
|   | 1.08       | Alfa-Aesar      |
|  | 1.49       | Sigma-Aldrich   |
|  | 158        | Sigma-Aldrich   |
|  | 1.87       | Sigma-Aldrich   |

**Table S3. Relative costing from building blocks**

| $r_1$      | $r_2$        | $r_1 = \text{aniline}, r_2 = \text{bromide} / \text{£}$ | $r_1 = \text{bromide}, r_2 = \text{aniline} / \text{£}$ |
|------------|--------------|---------------------------------------------------------|---------------------------------------------------------|
| <i>p</i>   | <i>p</i>     | 0.19                                                    | N/A                                                     |
| <i>m</i>   | <i>m</i>     | 0.9                                                     | N/A                                                     |
| <i>o</i>   | <i>o</i>     | 0.69                                                    | N/A                                                     |
| <i>p</i>   | <i>m</i>     | 0.7                                                     | 0.39                                                    |
| <i>p</i>   | <i>o</i>     | 0.69                                                    | 0.19                                                    |
| <i>p</i>   | <i>o,o</i>   | 35.58                                                   | 27.91                                                   |
| <i>p</i>   | <i>m,m</i>   | 2.25                                                    | 2.27                                                    |
| <i>p</i>   | <i>o,p</i>   | 1.16                                                    | 0.54                                                    |
| <i>p</i>   | <i>m,p</i>   | 1.57                                                    | 2.59                                                    |
| <i>p</i>   | <i>o,p,o</i> | 158.08                                                  | N/A                                                     |
| <i>p</i>   | <i>m,p,m</i> | 1.95                                                    | 2.8                                                     |
| <i>o,o</i> | <i>o,o</i>   | 63.3                                                    | N/A                                                     |
